# Supplementary material for: Predicting the sequence-dependent backbone dynamics of intrinsically disordered proteins
Source: eLife. 2024 Oct 30;12:RP88958. doi: 10.7554/eLife.88958 (PMC11524581; doi:10.7554/eLife.88958)
Supplement: Figure 3—figure supplement 1—source data 1. [file elife-88958-fig3-figsupp1-data1.xlsx]

## Sheet: Fig. 3-S1
A				B			C	R2 (s-1)			C	R2 (s-1)			E
Protein	# of res	mean R2 (s-1)		bin center (K)	Temparature count		Res #	298 K	scaled 278 K		Res #	298 K	scaled 288 K		bin center (MHz)	B0 count
A1-LCD	131	2.67707		275			401	1.1045	1.05902		1				500	7
Aβ40	40	3.39976		277	1		402	1.6851	1.05902		2				600	14
Ash1	83	9.80321		278	5		403	1.7563	1.08564		3	1.4509	0.790167		700	4
Beclin1	165	5.37165		280	1		404	1.8155	1.16005		4	2.474	1.22025		800	10
CAPRIN1	103	5.33889		283	6		405	1.8766	1.30265		5				850	5
CBP-ID4	207	5.4456		288	4		406	1.9723	1.38039		6	1.9364	1.24941		900	1
GbnD4-DHD	91	6.81287		295	1		407	2.3276	1.55015		7	1.6936	1.19837		950	1
ERD14	185	3.96235		298	20		408	2.2147	1.71211		8		1.38063
ExsE	88	3.17773		300	2		409	2.5286	1.92265		9		1.94188
FCP1	85	2.94021		303	3		410		1.90676		10		1.72322
FUS	163	3.48026		304	1		411				11		1.7159
GAb1	82	3.98527		310	1		412	2.3469	1.71211		12	2.3526
hACTR	69	3.2588					413		1.49961		13	2.4913	1.94916
Hahellin	92	9.9415					414	2.0219	1.41515		14	2.1098	1.76695
hCSD1	141	3.55882					415	1.9399	1.30265		15
HOX-DFD	90	6.9846					416	1.9399	1.475		16		1.82527
hZIP4-ICL2	100	9.5364					417	2.0387	1.64265		17	2.0925	1.70134
Jaburetox	94	6.0055					418	2.2517	1.84461		18	2.1618	1.87628
KRS-NT	72	3.26008					419	2.2517	2.0374		19	2.3699	2.03665
MBP-xα2	70	3.83073					420	2.487	2.05436		20	2.2312	2.59063
MKK4	86	4.48566					421	2.1965	1.92265		21	2.3353	1.78883
N-Cby	63	4.19066					422	2.487			22
Niv-PNTD	406	5.41055					423		2.0374		23	2.2139	2.09498
NS5A-D2D3	268	8.62388					424				24	2.2659	2.1387
NUPR1	93	2.98295					425		2.25029		25
OPN	220	2.5898					426	2.5922	2.40446		26
p53TAD	73	2.72234					427	2.9109	2.61211		27	2.422	2.89678
PDEγ	87	3.96184					428	2.9351	2.63382		28
PKIα	75	3.40759					429	3.0847	2.81426		29	2.6821	1.98561
Mev-PNTD	304	2.9203					430	3.0592	2.7452		30	2.474	2.38653
ProTα	113	3.39737					431	3.0847	2.7452		31	2.4913	2.72184
Pup	64	2.65511					432	2.9841	2.76804		32	2.9422	3.00615
rmBG21	199	4.06362					433	2.9841	2.65574		33	3.4971	3.27586
RPB1	201	6.48019					434	3.2418	2.76804		34	3.2543	2.94782
securin	202	5.49342					435	2.9841	2.76804		35	3.0636	3.26854
Sev-NT	124	3.20407					436	3.034	2.76804		36	2.7514	2.8895
Sic1	92	3.34325					437	3.2151	2.86127		37	2.9942
SKIPN	71	5.64419					438	3.1103	2.90907		38		2.83121
SLBP-NT	113	3.96269					439	3.1886	2.90907		39	2.8382	3.35603
α-synuclein	140	2.96076					440	3.2418	2.88505		40		3.30502
SOCS5-JIR	70	4.32196					441	3.2151	3.0827		41	3.0289	3.06444
tau K18	129	4.11588					442	3.1886	3.10833		42		2.84577
TC1	106	4.65412					443	3.1103	2.83765		43	2.9595	2.92594
TDP-43	151	4.06858					444	3.0592	2.90907		44	3.1503	2.79473
γ-tubulin-CT	39	2.22676					445	3.2418	2.98225		45	2.4566	2.72184
							446	3.2688	2.93324		46
							447	3.763	3.46172		47	2.8728	2.64895
							448	3.9548	3.69887		48	2.5607	2.86766
							449	4.088	4.22299		49	2.6474	2.75828
							450	4.3681	4.54985		50	2.8555	2.63439
							451	3.9877			51
							452	4.0208			52
							453	3.732			53	2.8382
							454	3.5511	3.43314		54	2.8728	3.0936
							455		3.05725		55	2.8728	2.57607
							456	3.2688	2.7452		56
							457	3.5806	2.98225		57
							458	3.5511	3.21304		58	2.7688
							459	3.8898	3.13417		59	3.0116
							460		3.54882		60
							461		3.23975		61
							462	3.5806	3.23975		62	3.5665
							463	3.407	2.88505		63	3.6358	3.99749
							464				64	3.4624	4.39841
							465	3.1362	2.86127		65	2.7861
							466	3.3234	3.00706		66	3.2543	3.23941
							467	3.351	3.05725		67	3.3584	3.46536
							468				68	3.2543	3.45808
							469	3.2418			69	3.4971	3.66218
							470	3.1103	2.83765		70	3.4798	3.45808
							471	2.9595	2.61211		71	2.9595
							472	3.1103	2.59054		72	2.7168	2.94782
							473				73		2.75828
							474	3.4354	2.98225		74
							475				75
							476	4.2963	4.5123		76	2.8208	2.86766
							477	5.3287	5.83324		77	3.1156	3.26126
							478	5.6937	5.93069		78		3.34874
							479	6.2887	7.05735		79	3.289	3.21025
							480	7.2998			80		3.14464
							481	6.4469	7.54083		81	3.0289	3.10088
							482		7.54083		82		3.10088
							483	6.7195			83	3.0462	3.0936
							484	7.9301	9.27574		84	2.8382	2.92594
							485	6.8886	7.85971		85	2.4566	2.96238
							486	6.5546			86
							487	6.8318	7.2951		87	3.1156	3.91732
							488	6.3937	7.73059		88	2.8728	2.56151
							489	5.554	6.28471		89	3.2543
							490	5.373	6.28471		90	2.1965
							491	4.987			91		2.9551
							492		5.36956		92		2.99155
							493	3.9222			93	2.5954	3.04987
							494				94	2.6994	2.42297
							495	3.0592	3.29387		95
							496	3.1362	3.18652		96	2.6301	2.58335
							497	2.7018	2.56917		97		2.89678
							498	2.7243	2.44461		98	2.3006	2.48858
							499	2.4462	1.9874		99
							500	2.5496			100	2.8035	3.12276
							501	2.406	2.00392		101	2.9249	3.56741
							502	2.4462	1.93863		102	2.7341
							503	2.6138	2.26902		103
							504	2.4199	1.84461		104
							505	2.4933	1.85995		105	2.9769	3.28314
							506	2.3497	1.7552		106	3.0462	3.23941
							507	2.2689	1.84461		107	3.2543	3.5018
							508	2.3084	1.89103		108		3.28314
							509	2.5286	1.82941		109	2.9595	3.34146
							510	2.5286	1.93863		110
							511	2.3469	1.93863		111	3.0462	2.80933
							512		1.92265		112	2.8902	2.94782
							513	2.2147			113	2.4046	2.46674
							514	2.1784	1.72637		114	2.4913
							515	2.1784	1.74074		115	2.474	2.21887
							516	2.0387	1.64265		116	2.3179
							517	1.8458	1.51211		117	2.0925	2.10226
							518	1.7132			118	2.6474	2.18971
							519	1.8612	1.40348		119		1.81795
							520	1.6851	1.17941		120	2.1445	1.68678
							521	1.4161	1.06784		121	2.0058	1.80339
							522	1.4397	0.950931		122	2.2139	2.01477
							523	1.2403	0.77951		123		1.78151
							524	0.7996	0.638971		124	2.0925	2.12414
											125	2.2659	2.11682
											126	2.1098	2.00021
											127	2.3006	2.15326
											128	2.0751
											129	2.0925	1.74506
											130	1.9191	1.83255
											131	1.9364	1.86172
