# Supplementary material for: Predicting the sequence-dependent backbone dynamics of intrinsically disordered proteins
Source: eLife. 2024 Oct 30;12:RP88958. doi: 10.7554/eLife.88958 (PMC11524581; doi:10.7554/eLife.88958)
Supplement: Figure 3—source data 1. [file elife-88958-fig3-data1.xlsx]

## Sheet: Fig. 3
A						Inset				B
bin center (s-1)	mean R2 count		bin center (s-1)	σ_R2 count		Protein	mean R2 (s-1)	σ_R2 (s-1)		AA	msR2 (s-1)	q (s-1)
1	0		0	0		A1-LCD	2.67707	0.462044		W	1.24827	1.3912
2	1		0.5	12		Aβ40	3.39976	0.921802		I	1.0785	1.2235
3	17		1	17		Ash1	9.80321	1.40219		Y	1.08846	1.1818
4	12		1.5	8		Beclin1	5.37165	1.03448		R	1.09261	1.1783
5	6		2	1		CAPRIN1	5.33889	0.87675		H	1.07586	1.1627
6	3		2.5	5		CBP-ID4	5.4456	2.54835		F	1.08511	1.1533
7	2		3	1		GbnD4-DHD	6.81287	1.54526		L	1.0531	1.1447
8	0		3.5	0		ERD14	3.96235	0.867086		K	1.03676	1.1258
9	1		4	1		ExsE	3.17773	0.879899		E	1.01698	1.1088
10	3		4.5	0		FCP1	2.94021	0.544096		M	1.01242	1.107
11	0		5	0		FUS	3.48026	0.506012		A	1.01741	1.0894
			5.5	0		GAb1	3.98527	0.882633		Q	1.0163	1.0702
						hACTR	3.2588	0.466435		C	0.933142	1.0544
						Hahellin	9.9415	2.68992		P	0.41808	1.0434
						hCSD1	3.55882	0.925789		T	0.976889	1.0414
						HOX-DFD	6.9846	3.14905		V	0.933661	1.0395
						hZIP4-ICL2	9.5364	2.36872		D	0.955552	1.0378
						Jaburetox	6.0055	2.30243		S	0.955775	1.0169
						KRS-NT	3.26008	0.934544		N	0.979423	0.9993
						MBP-xα2	3.83073	0.599622		G	0.90968	0.9838
						MKK4	4.48566	1.42282
						N-Cby	4.19066	1.20434
						Niv-PNTD	5.41055	1.81651
						NS5A-D2D3	8.62388	3.85268
						NUPR1	2.98295	0.820773
						OPN	2.5898	0.823026
						p53TAD	2.72234	0.664856
						PDEγ	3.96184	1.04702
						PKIα	3.40759	0.868895
						Mev-PNTD	2.9203	0.591858
						ProTα	3.39737	0.563308
						Pup	2.65511	0.509839
						rmBG21	4.06362	0.898927
						RPB1	6.48019	1.73581
						securin	5.49342	1.12997
						Sev-NT	3.20407	1.41958
						Sic1	3.34325	0.586187
						SKIPN	5.64419	1.04542
						SLBP-NT	3.96269	1.4021
						α-synuclein	2.96076	0.532789
						SOCS5-JIR	4.32196	2.36118
						tau K18	4.11588	0.945969
						TC1	4.65412	1.60786
						TDP-43	4.06858	1.51472
						γ-tubulin-CT	2.22676	0.346768
