# Supplementary material for: Predicting the sequence-dependent backbone dynamics of intrinsically disordered proteins
Source: eLife. 2024 Oct 30;12:RP88958. doi: 10.7554/eLife.88958 (PMC11524581; doi:10.7554/eLife.88958)
Supplement: Figure 4—figure supplement 1—source data 1. [file elife-88958-fig4-figsupp1-data1.xlsx]

## Sheet: Fig. 4-S1
	q (s-1)
	mean	SD
W	1.3761	0.0399986
I	1.21736	0.0210928
Y	1.17556	0.0270545
R	1.1774	0.0211501
H	1.16372	0.0151922
F	1.1552	0.0303579
L	1.14048	0.00664542
K	1.12306	0.00557803
E	1.1039	0.00954086
M	1.11036	0.0448102
A	1.08974	0.0169025
Q	1.06818	0.0131204
C	1.0532	0.0527804
P	1.04016	0.0157303
T	1.03984	0.00896919
V	1.03992	0.00771995
D	1.03696	0.00748481
S	1.01692	0.00911381
N	1.00076	0.00901057
G	0.98388	0.00967293
