# Supplementary material for: Predicting the sequence-dependent backbone dynamics of intrinsically disordered proteins
Source: eLife. 2024 Oct 30;12:RP88958. doi: 10.7554/eLife.88958 (PMC11524581; doi:10.7554/eLife.88958)
Supplement: Figure 4—source data 1. [file elife-88958-fig4-data1.xlsx]

## Sheet: Fig. 4
A				B				C				D
AA	msR2 (s-1)	q (s-1)		m (Da)	msR2 (s-1)	q (s-1)		Bulkiness (Å2)	msR2 (s-1)	q (s-1)		Lcorr	mean RMSE (s-1)
W	1.24827	1.3912		204	1.24827	1.3912		21.67	1.24827	1.3912		0	1.22363
I	1.0785	1.2235		131	1.0785	1.2235		21.4	1.0785	1.2235		1	1.03281
Y	1.08846	1.1818		181	1.08846	1.1818		18.03	1.08846	1.1818		2	0.989935
R	1.09261	1.1783		174	1.09261	1.1783		14.28	1.09261	1.1783		3	0.965217
H	1.07586	1.1627		155	1.07586	1.1627		13.69	1.07586	1.1627		4	0.952055
F	1.08511	1.1533		165	1.08511	1.1533		19.8	1.08511	1.1533		5	0.946618
L	1.0531	1.1447		131	1.0531	1.1447		21.4	1.0531	1.1447		6	0.9463
K	1.03676	1.1258		146	1.03676	1.1258		15.71	1.03676	1.1258		7	0.949217
E	1.01698	1.1088		147	1.01698	1.1088		13.57	1.01698	1.1088		8	0.953973
M	1.01242	1.107		149	1.01242	1.107		16.25	1.01242	1.107		9	0.959689
A	1.01741	1.0894		89	1.01741	1.0894		11.5	1.01741	1.0894		10	0.96581
Q	1.0163	1.0702		146	1.0163	1.0702		14.45	1.0163	1.0702
C	0.933142	1.0544		121	0.933142	1.0544		13.46	0.933142	1.0544
P		1.0434		115		1.0434		17.43		1.0434
T	0.976889	1.0414		119	0.976889	1.0414		15.77	0.976889	1.0414
V	0.933661	1.0395		117	0.933661	1.0395		21.57	0.933661	1.0395
D	0.955552	1.0378		133	0.955552	1.0378		11.68	0.955552	1.0378
S	0.955775	1.0169		105	0.955775	1.0169		9.47	0.955775	1.0169
N	0.979423	0.9993		132	0.979423	0.9993		12.82	0.979423	0.9993
G	0.90968	0.9838		75	0.90968	0.9838		3.4	0.90968	0.9838
