# Supplementary material for: Predicting the sequence-dependent backbone dynamics of intrinsically disordered proteins
Source: eLife. 2024 Oct 30;12:RP88958. doi: 10.7554/eLife.88958 (PMC11524581; doi:10.7554/eLife.88958)
Supplement: Figure 5—figure supplement 1—source data 1. [file elife-88958-fig5-figsupp1-data1.xlsx]

## Sheet: Fig. 5-S1
		R2 (s-1)
Res #	Seq	Expt	Pred
1	M		2.09441
2	Q		2.5303
3	Q	3.7977	3.02862
4	Q		3.62414
5	I	4.6799	4.35947
6	Q	6.8521	5.20882
7	H	5.1548	5.99918
8	R	3.7742	6.4899
9	L	7.0553	6.60772
10	Q	6.7384	6.50888
11	Q	7.1003	6.4048
12	A	6.5343	6.41028
13	Q	7.643	6.53197
14	L		6.7131
15	M	8.0953	6.87101
16	R	7.801	6.94572
17	R	8.0271	6.92129
18	R	6.6691	6.80265
19	M	4.0892	6.59766
20	A	7.574	6.32409
21	T	5.9671	6.0146
22	M	4.4734	5.70246
23	N	4.4959	5.41196
24	T		5.15681
25	R	4.9029	4.93465
26	N	4.7896	4.74165
27	V	3.9295	4.58627
28	P		4.47795
29	Q	3.816	4.42411
30	Q	3.9969	4.43213
31	S	4.472	4.48939
32	L	3.7024	4.55015
33	P		4.56789
34	S	4.0642	4.53932
35	P		4.49107
36	T		4.44203
37	S	3.7469	4.39445
38	A	5.1271	4.33364
39	P		4.23994
40	P		4.12129
41	G	3.9951	4.01821
42	T	3.8139	3.96016
43	P		3.93423
44	T	3.9267	3.91548
45	Q	3.9492	3.90277
46	Q	4.0849	3.90936
47	P		3.93846
48	S		3.98236
49	T	4.356	4.03343
50	P		4.08583
51	Q		4.13971
52	T	5.2379	4.2005
53	P		4.26861
54	Q	4.4229	4.33962
55	P		4.40349
56	P		4.4389
57	A	4.8072	4.42818
58	Q	5.056	4.37835
59	P		4.31427
60	Q	4.422	4.25627
61	P		4.21264
62	S	5.3042	4.18333
63	P		4.16569
64	V	3.8556	4.15658
65	S	4.4664	4.14969
66	M	4.4889	4.12708
67	S	3.9682	4.06642
68	P		3.96046
69	A	3.5154	3.82728
70	G		3.71827
71	F	3.515	3.69315
72	P		3.76927
73	S	3.8315	3.91744
74	V	3.5598	4.09456
75	A	5.0532	4.25404
76	R	4.0347	4.35351
77	T	4.3739	4.38361
78	Q	4.8038	4.36967
79	P		4.33295
80	P		4.27041
81	T	3.8302	4.17591
82	T	4.3505	4.05898
83	V	4.0562	3.94066
84	S		3.84396
85	T	4.0332	3.7902
86	G	3.6031	3.79909
87	K	3.6482	3.87537
88	P		3.99464
89	T	3.8289	4.12875
90	S	4.666	4.28075
91	Q	4.4396	4.47802
92	V	5.141	4.73752
93	P		5.04261
94	A	5.2537	5.35057
95	P		5.62418
96	P		5.8541
97	P		6.05127
98	P		6.23219
99	A	4.6419	6.42042
100	Q	6.769	6.65642
101	P		6.98593
102	P		7.4326
103	P		7.99637
104	A	9.5291	8.66357
105	A		9.40239
106	V	9.9588	10.1392
107	E	11.4974	10.7351
108	A	14.1902	11.0657
109	A	12.0854	11.1721
110	R	5.7038	11.2538
111	Q	9.9127	11.5311
112	I	13.4427	12.1
113	E	15.2303	12.7912
114	R	12.7409	13.2037
115	E	11.4508	13.0333
116	A	13.7815	12.368
117	Q	10.4322	11.6128
118	Q	11.2693	11.1509
119	Q	11.5633	11.1094
120	Q	11.0427	11.3185
121	H		11.3686
122	L		10.8713
123	Y	9.345	9.80364
124	R	8.3944	8.47806
125	V	7.7153	7.2337
126	N		6.25908
127	I	5.9499	5.59699
128	N	6.2213	5.205
129	N	5.5422	5.00324
130	S	4.8405	4.90412
131	M	4.2068	4.82303
132	P		4.69829
133	P		4.52415
134	G	4.9757	4.34028
135	R	4.1609	4.17668
136	T	4.1833	4.03347
137	G	4.2284	3.91361
138	M	3.9341	3.82688
139	G	3.5039	3.77561
140	T	3.7753	3.75928
141	P		3.77734
142	G	4.1144	3.84474
143	S	4.1822	3.9861
144	Q	3.8199	4.19437
145	M	3.865	4.41593
146	A	4.8153	4.58382
147	P		4.67083
148	V	6.1728	4.70283
149	S	4.6112	4.71588
150	L	4.4526	4.71651
151	N	4.294	4.6964
152	V	4.2486	4.6595
153	P		4.60308
154	R		4.50403
155	P		4.35047
156	N	4.9268	4.16813
157	Q	4.4515	4.00278
158	V	3.6592	3.89101
159	S	4.4511	3.85691
160	G	3.4326	3.918
161	P		4.06997
162	V	3.4549	4.27171
163	M	3.9073	4.46482
164	P		4.60709
165	S	4.1333	4.68851
166	M	4.7894	4.7121
167	P		4.68174
168	P		4.62795
169	G	5.6262	4.61068
170	Q	5.1961	4.66604
171	W	4.1324	4.76651
172	Q	4.6979	4.86767
173	Q	4.743	4.96251
174	A	5.8517	5.04831
175	P		5.08824
176	L	4.4484	5.03992
177	P		4.90663
178	Q	4.6064	4.75011
179	Q	4.2668	4.64389
180	Q	4.7193	4.61857
181	P		4.64846
182	M	3.678	4.68107
183	P		4.69026
184	G	4.9902	4.69347
185	L	4.4921	4.69747
186	P		4.66266
187	R		4.55174
188	P		4.37752
189	V	3.7447	4.19782
190	I	4.4687	4.07715
191	S		4.0412
192	M	4.8757	4.06304
193	Q	4.2646	4.09806
194	A	3.7892	4.12003
195	Q	3.5401	4.11821
196	A	3.5399	4.08112
197	A	3.6302	3.99525
198	V	2.8155	3.8644
199	A	3.9467	3.71619
200	G	3.494	3.58122
201	P		3.46004
202	R	2.6338	3.30753
203	M	2.9957	3.07302
204	P		2.75119
205	S	2.7691	2.38185
206	V		2.0131
207	Q		1.67961
