# Supplementary material for: Predicting the sequence-dependent backbone dynamics of intrinsically disordered proteins
Source: eLife. 2024 Oct 30;12:RP88958. doi: 10.7554/eLife.88958 (PMC11524581; doi:10.7554/eLife.88958)
Supplement: Figure 6—source data 1. [file elife-88958-fig6-data1.xlsx]

## Sheet: Fig. 6
A		R2 (s-1)			B		R2 (s-1)			C		R2 (s-1)			D		R2 (s-1)			E		R2 (s-1)			F		R2 (s-1)			G		R2 (s-1)			H		R2 (s-1)				I		R2 (s-1)
Res #	Seq	Expt	Pred		Res #	Seq	Expt	Pred		Res #	Seq	Expt	Pred		Res #	Seq	Expt	Pred		Res #	Seq	Expt	Pred		Res #	Seq	Expt	Pred		Res #	Seq	Expt	Pred		Res #	Seq	Expt	Pred	Helix boost		Res #	Seq	Expt	Pred	Helix boost
1	M	2.77909	2.418		201	G		1.8135		313	E	4.23729	6.048		1	M	2.34	2.682		1	M		1.8564		50	A	1.08684	2.2578		178	S	13.25	3.8233		1	M	2.90657	3.2832	2.592		0
2	T	2.89444	2.5916		202	P		1.9305		314	N	4.9505	5.8212		2	S	2.59	2.8459		2	S	1.8195	2.002		51	G	1.30395	2.4592		179	T	1.817	4.0885		2	T	3.38381	3.5568	2.808		1	M		1.9261	1.7017
3	P		2.7652		203	G	1.692	2.0709		315	L	4.38596	5.6196		3	A	2.46	2.9949		3	Q		2.1567		52	H	2.0028	2.6712		180	Q		4.3537		3	E		3.8152	3.012		2	S		2.0497	1.8109
4	V	2.64333	2.9388		204	E	3.3894	2.1996		316	Y	5.29101	5.4054		4	T	2.51	3.1439		4	K	2.0533	2.2932		53	Q	2.20556	2.862		181	P		4.6189		4	H		4.0584	3.204		3	G		2.1836	1.9292
5	R	4.12048	3.1		205	E		2.3283		317	F	4.73934	5.1912		5	A	2.86	3.2631		5	Q	2.257	2.4206		54	I	2.79877	3.021		182	Q	8.75	4.8841		5	N		4.2864	3.384		4	R	5.6279	2.3278	2.0566
6	P		3.2364		206	D	3.4517	2.4219		318	Q	4.38596	4.977		6	A	2.61	3.3674		6	E	2.5488	2.5207		55	V	3.24992	3.127		183	Q	7.867	5.1714		6	E	4.70579	4.5144	3.564		5	N	2.8837	2.472	2.184
7	P		3.3604		207	K	2.7611	2.4687		319	G	4.4843	4.788		7	T	3.2	3.4419		7	E	2.328	2.6026		56	H	3.76932	3.1906		184	N	8.1	5.4808		7	D		4.7272	3.732		6	V	3.814	2.6265	2.3205
8	H		3.4596		208	K		2.4804		320	G	4.29185	4.662		8	V	2.9	3.4866		8	E	2.3842	2.6572		57	V	3.41064	3.2118		185	N	7.13	5.8344		8	P		4.94	3.9		7	E	1.7209	2.781	2.457
9	T	4.74383	3.5464		209	R	3.1707	2.4453		321	Q	4.60829	4.5738		9	P		3.5313		9	N	2.4035	2.7027		58	R	3.38409	3.2118		186	E	9.671	6.2101		9	Q	4.25191	5.1528	4.068		8	S	1.7674	2.9252	2.5844
10	P		3.6332		210	G	2.3578	2.3751		322	Y	4.58716	4.536		10	P		3.5462		10	P		2.7482		59	G	4.68604	3.2012		187	E		6.5858		10	I	4.21323	5.32	4.2		9	H		3.0488	2.6936
11	D	5.47945	3.7324		211	G	3.7227	2.3166		323	V	4.7619	4.5234		11	A	3.05	3.5462		11	A	2.3277	2.7937		60	D	3.43053	3.2118		188	L		6.9615		11	E	4.12355	5.4264	4.284		10	M	4.5581	3.1415	2.7755
12	P		3.844		212	G		2.2581		324	P		4.536		12	A		3.5313		12	E	2.3094	2.8392		61	S	3.33111	3.233		189	P		7.3151		12	R	3.60356	5.4568	4.308		11	E	1.7674	3.2033	2.8301
13	L	4.49458	3.9556		213	T	2.0794	2.2113		325	N	5.52486	4.5738		13	P		3.4866		13	E	2.2565	2.8847		62	E	3.97298	3.2966		190	T	12.12	7.6245		13	V	4.13675	5.4416	4.296		12	R		3.2033	2.8301
14	N	4.72478	4.0796		214	A	1.7393	2.1762		326	G	4.87805	4.6368		14	A	2.77	3.4419		14	T	2.3275	2.9302		63	T	4.31034	3.3708		191	Y	10.17	7.8897		14	A	4.39416	5.396	4.26		13	N		3.1724	2.8028
15	L	5.18968	4.2036		215	V	3.1237	2.1528		327	W	4.62963	4.6872		15	G	2.43	3.3972		15	G	2.6391	2.9939		64	D	4.64253	3.4556		192	E	8.27	8.1107		15	D	5.52817	5.3504	4.224		14	E	1.7209	3.1106	2.7482
16	R	4.03145	4.3152		216	G	1.878	2.1411		328	Q	4.80769	4.725		16	E	2.58	3.3674		16	E	2.5814	3.0576		65	L	5.50358	3.5404		193	E		8.2433		16	D	6.65723	5.32	4.2		15	K	2	3.0282	2.6754
17	G	3.84039	4.4392		217	G	3.6585	2.1645		329	V	4.78469	4.7376		17	G	2.7	3.3525		17	E	2.5154	3.1213		66	E	6.08273	3.604		194	A		8.3096		17	A	6.5623	5.32	4.2		16	V		2.9355	2.5935
18	P		4.588		218	G	3.5911	2.2113		330	P		4.725		18	G	2.83	3.3525		18	K	2.4426	3.185		67	A	6.81199	3.6358		195	K	13.28	8.3317		18	A	6.76205	5.3352	4.212		17	V	1.5814	2.8531	2.5207
19	L	4.06256	4.7616		219	G	3.7309	2.2932		331	A	4.46429	4.6998		19	P		3.3972		19	Q	2.7364	3.2578		68	L	5.91716	3.6252		196	A	8.316	8.3317		19	D	6.0099	5.3656	4.236		18	V	1.1163	2.781	2.457
20	D	4.11811	4.9972		220	V	3.1272	2.3985		332	Y	5.46448	4.662		20	P		3.4717		20	D		3.3306		69	F	6.10501	3.5722		197	Q	12.8	8.3096		20	E	6.02695	5.4112	4.272		19	N	1.4884	2.7501	2.4297
21	G	4.1389	5.2824		221	A	1.792	2.5155		333	G	4.90196	4.6368		21	A	4.19	3.5462		21	T	2.6865	3.4216		70	N	6.57462	3.5086		198	S	12.83	8.3096		21	E	5.31107	5.4416	4.296		20	N		2.7604	2.4388
22	P		5.6172		222	E	2.648	2.6208		334	V	5.12821	4.6242		22	P		3.6356		22	Q	3.0463	3.5217		71	A	6.37349	3.4238		199	Q		8.3096		22	A	4.30541	5.472	4.32		21	S		2.8119	2.4843
23	R	5.08182	5.9396		223	P		2.7261		335	Y	4.71698	4.6242		23	P		3.7399		23	E	2.9846	3.64		72	V	8.37521	3.3496		200	F		8.2875		23	V	3.92295	5.5024	4.344		22	G	1.4419	2.8943	2.5571
24	W	4.99975	6.1876		224	E	3.597	2.7963		336	G	4.85437	4.6242		24	P		3.8591		24	K	3.939	3.7674		73	M	8.1367	3.286		201	F	13.35	8.1991		24	T	4.06228	5.5328	4.368		23	H		3.0076	2.6572
25	R	6.59979	6.2992		225	Q	3.6804	2.8548		337	Q	4.83092	4.6368		25	N	4.38	3.9783		25	E	3.0776	3.9039		74	N	5.36193	3.2436		202	R		8.0665		25	E	4.27358	5.5936	4.416		24	A		3.1415	2.7755
26	R	6.14893	6.262		226	D	2.888	2.8899		338	P		4.6368		26	L	4.49	4.1273		26	G	3.9386	4.0313		75	P		3.2118		203	G	10.75	7.8676		26	P		5.6544	4.464		25	D	2	3.2651	2.8847
27	A	5.90075	6.1132		227	C	3.6	2.925		339	W	5.52486	4.5864		27	T	4.85	4.2912		27	I	2.9842	4.1496		76	K		3.18		204	Q	11.45	7.6908		27	L	4.07841	5.7	4.5		26	V	2	3.3887	2.9939
28	E	4.88639	5.9024		228	A	2.5384	2.9484		340	S	5.20833	4.4982		28	S	4.52	4.4849		28	L	3.2823	4.2588		77	T	3.71333	3.1694		205	Q		7.4919		28	A	3.26057	5.7608	4.548		27	K	1.6279	3.5123	3.1031
29	P		5.6668		229	V	3.602	2.9835		341	Q	4.31034	4.3848		29	N	4.65	4.6786		29	P		4.3589		78	A	3.17965	3.1694		206	Q		7.3372		29	T	3.92797	5.8064	4.584		28	K	2.3721	3.6153	3.1941
30	A	5.47555	5.4684		230	T	3.0554	3.0303		342	Q	4.1841	4.2588		30	R	4.87	4.8574		30	E	3.6919	4.4408		79	N	2.98418	3.18		207	Q		7.1825		30	E	4.38144	5.8672	4.632		29	Q		3.708	3.276
31	Q	4.1088	5.2948		231	S	3.6041	3.1122		343	G	3.84615	4.1328		31	R	5.44	5.0064		31	R	3.9376	4.4954		80	V	3.34001	3.2224		208	Q		7.0499		31	S	3.82128	5.9432	4.692		30	Q		3.7904	3.3488
32	S	4.48471	5.1584		232	G	2.2775	3.2058		344	F	3.98406	4.032		32	L	5.16	5.0809		32	A	4.407	4.5318		81	P		3.2966		209	Q		6.9394		32	K	3.55213	6.0496	4.776		31	Q	2.4651	3.8728	3.4216
33	R	5.22411	5.0344		233	E	3.8656	3.3228		345	N	3.83142	3.9564		33	Q	4.66	5.1107		33	E	4.2181	4.55		82	Q	3.50385	3.4026		210	Q		6.8289		33	D	4.49209	6.1712	4.872		32	Q	1.9535	3.9655	3.5035
34	R	5.12952	4.898		234	E	3.4515	3.4281		346	Q	3.73134	3.906		34	Q	4.94	5.0809		34	E	4.4065	4.5591		83	T	3.8625	3.551		211	Q		6.7405		34	E	6.05081	6.3384	5.004		33	V	1.907	4.0685	3.5945
35	P		4.774		235	L	3.118	3.51		347	T	3.48432	3.8808		35	T	4.9	5.0362		35	A	4.2479	4.55		84	V	4.00481	3.7312		212	G	5.757	6.7184		35	P		6.5208	5.148		34	E	2.1395	4.1715	3.6855
36	G	4.0853	4.6376		236	L	3.3171	3.5334		348	Q	3.55872	3.8934		36	Q	5.02	4.9915		36	K	4.1875	4.5136		85	P		3.9326		213	A	7.043	6.7184		36	A	4.8322	6.7336	5.316		35	H	5.5349	4.2745	3.7765
37	R	4.05318	4.526		237	A	2.7943	3.4983		349	S	3.84615	3.9312		37	A		4.9617		37	L	4.1873	4.459		86	M	4.75964	4.1552		214	V	7.088	6.7847		37	E	5.09618	6.9464	5.484		36	T	3.1163	4.3775	3.8675
38	S	4.20256	4.4144		238	L	2.9484	3.4164		350	S	4.09836	3.9816		38	Q	5.19	4.9468		38	K		4.368		87	R	4.78011	4.3566		215	G	7.16	6.8952		38	H		7.144	5.64		37	E	2.3721	4.4496	3.9312
39	R	5.04745	4.3276		239	P		3.2994		351	A	3.90625	4.0446		39	V		4.9617		39	A	4.0998	4.2497		88	L	5.40833	4.505		216	H	8.41	7.0278		39	P		7.3568	5.808		38	F	4.6512	4.5217	3.9949
40	P		4.2656		240	P		3.1707		352	P		4.0824		40	D	5.72	5.0064		40	K	3.9098	4.095		89	R	4.39947	4.5792		217	G	5.787	7.1604		40	E		7.5392	5.952		39	T	2.7442	4.5629	4.0313
41	G	3.57833	4.2408		241	P		3.0537		353	W	5.43478	4.0698		41	E	5.91	5.066		41	Y	3.8088	3.9221		90	K		4.5792		218	Y		7.2267		41	F	5.32809	7.752	6.12		40	H		4.6041	4.0677
42	G	3.73664	4.278		242	P		2.9484		354	M	4.329	3.9942		42	V	5.78	5.1554		42	P		3.7401		91	L	4.61042	4.5368		219	Y		7.2267		42	E	6.23898	7.98	6.3		41	T	2.3721	4.6453	4.1041
43	A	4.76894	4.3648		243	P		2.8665		355	G	3.90625	3.8808		43	V	5.88	5.2746		43	S	3.4326	3.5672		92	P		4.4626		220	M		7.1162		43	G	6.41124	8.2536	6.516		42	E	2.7907	4.6865	4.1405
44	P		4.4888		244	P		2.808		356	P		3.7422		44	D	6.68	5.3938		44	L	3.2441	3.4125		93	D	3.93701	4.3884		221	A	8.6	6.9394		44	P		8.6184	6.804		43	V	1.2093	4.7483	4.1951
45	L	5.64685	4.6004		245	G	3.1871	2.7846		357	N	4.78469	3.6162		45	I	6.32	5.4981		45	G	3.8578	3.2851		94	S	4.41891	4.3354		222	G	7.39	6.7847		45	R		9.0288	7.128		44	K	2.2326	4.8204	4.2588
46	R	4.2584	4.6624		246	G	4.1826	2.7846		358	Y	4.62963	3.4902		46	M	6.94	5.5577		46	Q	2.9376	3.1759		95	F	4.33651	4.293		223	G	6.384	6.6742		46	R		9.4544	7.464		45	A	2.186	4.9131	4.3407
47	Y	4.46548	4.6376		247	A	1.9509	2.8314		359	S	4.62963	3.3768		47	R	6.84	5.5577		47	K	2.8802	3.1031		96	F	5.18941	4.24		224	T	5.97	6.63		47	R	9.3669	9.8344	11.6111		46	P		4.9955	4.4135
48	H		4.5012		248	V	3.1274	2.9016		360	V	3.52113	3.2634		48	V	6.38	5.5428		48	P		3.0576		97	K		4.1764		225	S	6.37	6.6742		48	A		10.1536	12.004		47	L		5.0573	4.4681
49	R	5.08802	4.3028		249	P		2.9835		361	P		3.1626		49	N	6.49	5.5279		49	G	4.1262	3.0485		98	P		4.1128		226	Q	6.217	6.7847		49	R	7.99168	10.3664	12.2637		48	I		5.0779	4.4863
50	T	4.61851	4.0548		250	P		3.0771		362	P		3.0744		50	V		5.5577		50	G	3.4923	3.1031		99	P		4.0386		227	K		6.9173		50	R	9.30293	10.488	12.4076		49	H		5.0573	4.4681
51	G	3.88848	3.8192		251	A	2.4595	3.1707		363	P		3.0114		51	D	6.63	5.6322		51	S	3.4514	3.2123		100	E	3.60101	3.975		228	S	7.09	7.0278		51	E		10.5184	12.4435		50	P		4.9955	4.4135
52	V	3.57066	3.6208		252	A	2.46	3.276		364	Q	3.59712	2.9484		52	K	6.29	5.7514		52	D	2.908	3.367		101	P		3.9114		229	R	6.47	7.1162		52	R	13.4628	10.488	12.4117		51	A	2.1395	4.9131	4.3407
53	G	3.7294	3.472		253	P		3.3813		365	G	3.125	2.898		53	V	6.77	5.9004		53	F	3.7823	3.5581		102	K		3.869		230	T	7.05	7.1383		53	A	14.2211	10.3816	12.2858		52	P		4.8204	4.2588
54	M	3.51914	3.348		254	V	3.7971	3.4866		366	Q	3.1746	2.8854		54	L	8.12	6.0494		54	L	4.2742	3.7401		103	S	2.87026	3.816		231	E	6.692	7.1604		54	E	10.9964	10.2448	12.1239		53	P		4.738	4.186
55	S	3.68433	3.2488		255	A	2.7564	3.5802		367	N	3.11526	2.8854		55	E		6.1686		55	M	4.5363	3.8948		104	H		3.763		232	G	6.263	7.1162		55	R	10.5519	10.0624	11.9081		54	I	1.3488	4.6247	4.0859
56	R	4.80654	3.162		256	A	2.8053	3.6504		368	G	2.93255	2.9232		56	R		6.258		56	K		4.004		105	S	2.53485	3.6888		233	R		7.0941		56	R	12.8092	9.8496	11.6562		55	I	2.1395	4.5011	3.9767
57	T	3.82936	3.0628		257	R	3.4718	3.6972		369	S	3.08642	2.9862		57	D	7.08	6.3027		57	R		4.0495		106	R	2.48201	3.604		234	P		7.0499		57	A	11.1221	9.6216	11.3864		56	S	2.3721	4.3569	3.8493
58	G	3.48286	2.9636		258	E	3.4731	3.7089		370	M	2.8169	3.0492		58	Q		6.3176		58	L	4.336	4.0404		107	Q	2.39406	3.5086		235	T	6.47	7.0057		58	A	8.32432	9.4088	11.1346		57	T	1.907	4.223	3.731
59	H		2.8644		259	G	2.6673	3.6855		371	L	3.1746	3.1248		59	K	7.19	6.3027		59	Q	4.2122	3.9949		108	A	2.27015	3.392		236	V		6.9836		59	Q	10.8339	9.2416	10.9367		58	G	1.2093	4.1303	3.6491
60	G	3.21079	2.7528		260	R	4.2008	3.627		372	P		3.1752		60	L	6.9	6.2878		60	K		3.9312		109	S	2.07555	3.286		237	N	6.42	6.9836		60	A	12.2085	9.1048	10.7748		59	A	1.6744	4.0788	3.6036
61	S	3.41997	2.6412		261	L	2.6249	3.5451		373	S	3.14465	3.2256		61	S	6.17	6.2431		61	G	4.3998	3.8675		110	T	2.16497	3.1906		238	R		7.0057		61	R	11.0085	9.0288	10.6849		60	A	1.4419	4.0685	3.5945
62	R	3.88878	2.5048		262	P		3.4398		374	Q	3.07692	3.276		62	E		6.2133		62	Q	3.9577	3.8038		111	D	2.18484	3.127		239	A		7.0499		62	A	16.4788	8.9984	10.6489		61	G	1.3023	4.0891	3.6127
63	P		2.3684		263	P		3.3345		375	P		3.3264		63	L	6.46	6.1686		63	K		3.7401		112	A	1.98452	3.0846		240	N	5.79	7.1383		63	T	12.5116	8.9984	10.6489		62	L	1.907	4.1303	3.6491
64	V	2.34247	2.232		264	G	4.6976	3.2292		376	A	3.20513	3.3768		64	D	6.07	6.1239		64	Y	4.1519	3.6673		113	G	2.19058	3.0634		241	S	5.79	7.2709		64	A	16.3051	9.0288	10.6849		63	A	1.7674	4.1612	3.6764
					265	L	3.5323	3.1473		377	G	3.21543	3.4272		65	D	5.74	6.0941		65	F	4.0382	3.5672		114	T	2.03583	3.0846		242	G	5.223	7.514		65	I	11.7292	9.0744	10.7388		64	E	2.0465	4.1715	3.6855
					266	S	2.429	3.0771		378	Y	3.47222	3.4398		66	R		6.0494		66	D	3.7558	3.4671		115	A	1.94818	3.1164		243	Q	7.398	7.8455		66	E	14.1886	9.12	10.7928		65	E	2.5116	4.1406	3.6582
					267	A	1.9566	3.0069		379	R	3.16456	3.4272		67	A	6.42	6.0047		67	S	3.732	3.3852		116	G	1.89036	3.18		244	A		8.2212		67	Q	11.8685	9.1656	10.8468		66	I	1.7674	4.0788	3.6036
					268	S	2.3586	2.9601		380	V	3.02115	3.3768		68	D	5.87	5.9451		68	G	4.7515	3.3397		117	A	2.1097	3.2648		245	H	6.315	8.6411		68	A	12.8727	9.196	10.8827		67	V	1.7674	3.9861	3.5217
					269	P		2.925		381	A	3.31126	3.2886		69	A	5.26	5.8855		69	D	3.9041	3.3306		118	L	2.09161	3.3496		246	K	5.54	9.0168		69	R	9.58825	9.196	10.8791		68	G	2.3721	3.9037	3.4489
					270	Q	3.0831	2.9016		382	G	2.63852	3.1626		70	L	5.82	5.811		70	Y	4.1799	3.3488		119	T	2.40558	3.4344		247	D	8.38	9.3925		70	R		9.1656	10.8468		69	Q	4.4651	3.8419	3.3943
					271	P		2.9016		383	Y	3.1348	3.024		71	Q	5.39	5.7365		71	N	4.3648	3.4034		120	P		3.5192		248	E	8.68	9.7019		71	A	11.5404	9.0896	10.7568		70	G	1.5349	3.811	3.367
					272	S	2.4689	2.925		384	E	2.40385	2.8476		72	A	4.89	5.6769		72	M	4.3326	3.458		121	Q	2.84495	3.5934		249	A	9.16	9.9892		72	A	7.51949	8.968	10.6058		71	F	2.4186	3.8213	3.3761
					273	S	3.0851	2.9601		385	T	2.17865	2.6712		73	G	4.66	5.6471		73	A	4.209	3.5035		122	H	2.94551	3.6464		250	L	6.958	10.2102		73	K	9.01452	8.8008	10.4012		72	T	2.2791	3.8522	3.4034
					274	V	3.6456	3.0186		386	Q	1.48588	2.4822		74	A		5.6769		74	K	4.2088	3.5399		123	V	3.02024	3.6782		251	K	9.12	10.3428		74	R	8.73676	8.5576	6.756		73	A	1.6744	3.9037	3.4489
					275	A	2.1133	3.0888							75	S	4.9	5.7514		75	A	3.9818	3.549		124	R	2.97619	3.6676		252	E	10.52	10.4091		75	R	8.4615	8.2536	6.516		74	S	1.907	3.9552	3.4944
					276	P		3.1473							76	Q	5.65	5.8855		76	K	4.1493	3.5308		125	A	2.84172	3.6146		253	L	9.81	10.387		76	A	5.47174	7.8888	6.228		75	A	1.5814	4.0067	3.5399
					277	R		3.1824							77	F		6.0494		77	M	4.4622	3.4853		126	H		3.5404		254	K	9.26	10.2986		77	R	5.83307	7.4936	5.916		76	A	1.7674	4.0376	3.5672
					278	R	2.5377	3.159							78	E	6.34	6.2431		78	K	4.2079	3.4216		127	S	2.59134	3.445		255	Q	9.596	10.2102		78	G	2.91785	7.0984	5.604		77	R	2.5581	4.0376	3.5672
					279	P		3.1005							79	T	6.99	6.4815		79	N	3.638	3.3306		128	S	2.36742	3.3496		256	G	6.8	10.1439		79	Q	4.09203	6.7184	5.304		78	I	1.907	3.9861	3.5217
					280	Q	3.7218	2.9835							80	S	7.23	6.7795		80	K		3.2396		129	P		3.2754		257	H	8.87	10.1218		80	I	3.1307	6.384	5.04		79	S	2.7442	3.9243	3.4671
					281	E	1.9847	2.8431							81	A	8.1	7.152		81	Q	3.1527	3.1395		130	A	2.48201	3.2224		258	V		10.166		81	V	2.96918	6.0648	4.788		80	G	1.4419	3.8728	3.4216
					282	P		2.6676							82	A	7.88	7.6139		82	L	2.8626	3.0303		131	S	2.3245	3.1694		259	R	12.22	10.2544		82	S	3.62168	5.7912	4.572		81	G	1.1628	3.8522	3.4034
					283	R	1.6579	2.4804							83	K	7.4	8.1354		83	P		2.9211		132	L	2.42248	3.1058		260	S	6.19	10.387		83	E	2.71587	5.548	4.38		82	T	2.0465	3.8934	3.4398
															84	L	7.97	8.6867		84	S	2.6566	2.8301		133	Q	2.39464	3.0422		261	L	12.86	10.5417		84	Q	3.09667	5.3656	4.236		83	A	1.4884	3.9655	3.5035
															85	K		9.238		85	A	3.2209	2.7482		134	L	2.35682	2.9574		262	S	15.38	10.7406		85	N	3.20461	5.2136	4.116		84	E	2.4651	4.0685	3.5945
															86	R		9.6999		86	G	2.2517	2.6936		135	G	2.3546	2.862		263	E	11.65	10.8953		86	P		5.1224	4.044		85	V	1.907	4.1715	3.6855
															87	K	8.6	10.0426		87	P		2.6663		136	A	2.08073	2.7666		264	R		11.0058		87	A		5.0464	3.984		86	H	2.093	4.2539	3.7583
															88	Y	8.87	10.132		88	D	2.6443	2.6572		137	V	2.00884	2.6818		265	I	10.85	11.0279		88	K	2.0993	4.9856	3.936		87	L	1.9535	4.3157	3.8129
															89	W	8.98	9.9383		89	K	2.8344	2.6663		138	S	2.16497	2.6076		266	M		10.8953		89	P		4.9096	3.876		88	Q	2.4186	4.3672	3.8584
															90	W	9.79	9.4317		90	N	2.9473	2.6754		139	P		2.5546		267	Q	10.55	10.6743		90	A	2.36468	4.8184	3.804		89	P		4.4084	3.8948
															91	K	7.81	8.6867		91	L	2.6206	2.6936		140	G	2.41779	2.5122		268	L		10.3649		91	A	2.08118	4.6968	3.708		90	S	3.2558	4.4702	3.9494
															92	N	7.04	7.8225		92	V	2.4778	2.7118		141	T	2.15936	2.491		269	S		10.0334		92	R	4.6458	4.5448	3.588		91	A	1.907	4.5732	4.0404
															93	L	5.84	6.9583		93	T	2.7938	2.7482		142	L	2.33046	2.4592		270	L		9.7019		93	G	3.11271	4.3928	3.468		92	A	1.4884	4.6968	4.1496
															94	K	5.08	6.1239		94	G	3.3473	2.7937		143	T	2.20653	2.438		271	E	12.17	9.3262		94	V	1.66563	4.2408	3.348		93	M	3.907	4.8513	4.2861
															95	M		5.3491		95	D	2.5635	2.8483		144	P		2.3956		272	R		8.9726		95	V	1.58015	4.0736	3.216		94	T	5.4884	5.0264	4.4408
															96	M		4.6637		96	H	2.8611	2.9029		145	T	2.405	2.3638		273	N	9.16	8.6411		96	R	2.15092	3.9064	3.084		95	E	7.4884	5.2221	4.6137
																				97	I	2.861	2.9302		146	G	3.78931	2.3426		274	G	8.84	8.3538		97	G	2.84658	3.7088	2.928		96	E	8.7442	5.4281	7.17197
																				98	P		2.9393		147	V	2.21976	2.3426		275	A		8.0886		98	L	2.38508	3.496	2.76		97	A	8.7442	5.6238	7.43551
																				99	T	2.9611	2.9393		148	V	2.07641	2.3532		276	K	7.25	7.8676		99	K	3.29521	3.268	2.58		98	R	7.2093	5.7989	7.6619
																				100	P		2.9302		149	S	2.0008	2.3956		277	Q	7.171	7.6024								99	R	8.3256	5.9534	7.86603
																				101	Q	3.3463	2.9302		150	G	3.03122	2.4486		278	H	9.019	7.2709								100	D	6.3256	6.0976	8.05925
																				102	D	3.4237	2.9302		151	P		2.5334		279	L	6.7	6.8952								101	Q		6.2212	8.22811
																				103	L	2.4769	2.9302		152	A	1.97707	2.6288		280	P		6.4974								102	E		6.3345	8.38356
																				104	P		2.9302		153	A	1.98728	2.7348		281	G	5.97	6.1217								103	R		6.4272	8.50624
																				105	Q	2.8881	2.912		154	T	2.21631	2.8408		282	S	5.18	5.8123								104	Y	6.5116	6.4581	8.54714
																				106	R		2.8756		155	P		2.9574		283	G		5.5913								105	R	13.3953	6.4375	8.51988
																				107	K	2.9602	2.8119		156	T	2.42777	3.0846		284	N		5.4808								106	Q	4.6512	6.3757	8.43808
																				108	S	2.8325	2.7391		157	A	2.63158	3.2118		285	G	5.74	5.4366								107	E	4.6512	6.3036	8.34266
																				109	S	2.9749	2.6572		158	Q	2.53743	3.3284		286	K		5.4366								108	Q	11.3023	6.2315	8.24724
																				110	L	2.4868	2.5844		159	H	2.80899	3.4132		287	G	6.57	5.4366								109	E	11.2093	6.18	8.17908
																				111	V	2.4355	2.5116		160	L	2.87356	3.4556		288	F	5.958	5.4366								110	S	8.7442	6.1594	8.15182
																				112	T	2.6072	2.4388		161	R	2.74273	3.445		289	K	5.389	5.3703								111	I	8.2791	6.1697	8.16545
																				113	S	2.5399	2.366		162	Q	2.55558	3.392		290	V		5.2819								112	A	8.9767	6.18	8.17635
																				114	K	2.2672	2.2841		163	S	2.47954	3.3178		291	G	4.342	5.1935								113	K	8.9767	6.2006	8.2036
																				115	L	2.1834	2.1931		164	S	2.43546	3.233		292	G	4.263	5.1493								114	Q		6.2315	8.24449
																				116	A	2.0472	2.093		165	F	2.49563	3.127		293	G	3.951	5.1714								115	Q		6.283	8.30985
																				117	G	2.1832	1.9838		166	E	2.44738	2.9998		294	P		5.2377								116	E		6.3345	8.37796
																				118	G	2.1205	1.8837		167	I	2.23864	2.8302		295	S		5.3703								117	R		6.3757	8.43527
																				119	Q		1.7836		168	P		2.6394		296	P		5.525								118	E		6.4169	8.48978
																				120	V	1.5525	1.6926		169	D	1.98649	2.438		297	A		5.7239								119	M		6.4375	8.51419
																				121	E	0.9112	1.6107		170	D	1.64015	2.2366		298	Q	4.753	5.9007								120	E	5.9535	6.4478	8.52496
																									171	V	1.08578	2.0564		299	P		6.0775								121	K		6.4581	8.53858
																														300	A	4.946	6.2543								122	K		6.4684	5.7148
																														301	G	4.486	6.409								123	T	9.0698	6.489	5.733
																														302	K	4.822	6.5858								124	E	9.0698	6.5302	8.63679
																														303	V		6.7405								125	A	10.2326	6.5817	8.70781
																														304	L	5.63	6.8731								126	Y	8.9767	6.6126	8.74285
																														305	D	5.429	6.9836								127	R	10.8837	6.6229	8.75647
																														306	P		7.0941								128	K	10.4651	6.6126	8.74577
																														307	R	6.71	7.1825								129	T	10.7907	6.592	8.71853
																														308	G	7.11	7.293								130	A	8.3721	6.592	8.71853
																														309	P		7.4256								131	E	7.907	6.6332	8.77595
																														310	P		7.6245								132	A	9.907	6.7259	8.89859
																														311	P		7.8676								133	E	17.7209	6.8495	9.06212
																														312	E	5.142	8.1328								134	A		7.0143	9.28326
																														313	Y	8.53	8.3759								135	E	12.6512	7.1894	9.515
																														314	P		8.5527								136	K	13.8605	7.3542	9.73311
																														315	F	6.34	8.6411								137	I	12.2791	7.4778	9.89669
																														316	K		8.6632								138	R	14.3256	7.5396	9.97848
																														317	T	8.7	8.619								139	K	5.3953	7.5293	9.96485
																														318	K		8.5085								140	E	9.3953	7.4572	9.86613
																														319	Q		8.3538								141	L	7.5349	7.3439	9.71299
																														320	M		8.1991								142	E	4.4651	7.2203	6.3791
																														321	M		8.0223								143	K	11.9535	7.0864	6.2608
																														322	S	6.68	7.8676								144	Q	9.6744	6.9628	6.1516
																														323	P		7.7792								145	H	11.3953	6.8495	6.0515
																														324	V		7.7571								146	A	10.6512	6.7465	5.9605
																														325	S		7.8234								147	R	6.1395	6.6641	5.8877
																														326	K	6.94	7.956								148	D	5.3488	6.6023	5.8331
																														327	T	7.49	8.1107								149	V	6.4186	6.592	5.824
																														328	Q		8.3096								150	E		6.6126	5.8422
																														329	E		8.5085								151	F	7.5814	6.6435	5.8695
																														330	H		8.6853								152	R	5.2093	6.6641	5.8877
																														331	G	13.65	8.8179								153	K	3.0233	6.6641	5.8877
																														332	L	9.12	8.8842								154	D	5.4884	6.6435	5.8695
																														333	F		8.9063								155	L	3.1163	6.5817	5.8149
																														334	Y	9.05	8.8621								156	I	4.2326	6.5096	5.7512
																														335	G	9.06	8.7958								157	E	4.8372	6.4169	5.6693
																														336	D		8.7516								158	S	4.9302	6.3345	5.5965
																														337	Q		8.7295								159	T	4.4186	6.283	5.551
																														338	H		8.7516								160	I	3.1628	6.2418	5.5146
																														339	P		8.8179								161	D	4.8372	6.2212	5.4964
																														340	G	8.75	8.9284								162	R	4.1395	6.2006	5.4782
																														341	M		9.0831								163	Q	6.6977	6.1697	5.4509
																														342	L	5.05	9.2157								164	K	5.5349	6.1182	5.4054
																														343	H	8.66	9.3041								165	R	5.6744	6.0461	5.3417
																														344	E	7.868	9.3041								166	E	4.2326	5.974	5.278
																														345	M	8.04	9.2599								167	V	4.8372	5.9019	5.2143
																														346	V	9.15	9.1273								168	D	5.4419	5.8607	5.1779
																														347	K	9.19	8.9947								169	L	4.8372	5.8607	5.1779
																														348	P		8.8179								170	E	5.6279	5.8813	5.1961
																														349	Y		8.6411								171	A	6	5.9122	5.2234
																														350	P		8.4422								172	K	5.1628	5.9431	5.2507
																														351	A	8.14	8.2433								173	M	6.0465	5.974	5.278
																														352	P		8.0886								174	A	6.0465	5.9946	5.2962
																														353	Q		7.956								175	K	4.6047	5.9946	5.2962
																														354	P		7.8897								176	R		5.9534	5.2598
																														355	V		7.8455								177	E	6.0465	5.8813	5.1961
																														356	R	7.94	7.8234								178	L	3.8605	5.768	5.096
																														357	T	7.32	7.8455								179	D	5.1163	5.6444	4.9868
																														358	D		7.8897								180	R	6.7907	5.5105	4.8685
																														359	V	6.4	7.9781								181	E	7.8605	5.3972	4.7684
																														360	A	7.63	8.1107								182	G	5.3023	5.3148	4.6956
																														361	V		8.2433								183	Q		5.2736	4.6592
																														362	L	8.84	8.3317								184	L		5.2633	4.6501
																														363	R		8.3538								185	A	6.186	5.2736	4.6592
																														364	Y		8.2433								186	K	4.6512	5.2839	4.6683
																														365	Q		8.0665								187	E	6.8837	5.2736	4.6592
																														366	P		7.8455								188	A	8.2326	5.2427	4.6319
																														367	P		7.6024								189	L	6.6512	5.1809	4.5773
																														368	P		7.3593								190	E	4.2791	5.0882	4.4954
																														369	E	7.6	7.1383								191	R		4.944	4.368
																														370	Y	7.85	6.9394								192	S	5.7209	4.7689	4.2133
																														371	G	6.01	6.7405								193	R	4.2791	4.5629	4.0313
																														372	V	5.88	6.5858								194	L	3.814	4.3363	3.8311
																														373	T	5.94	6.4753								195	A	2.9767	4.0891	3.6127
																														374	S	5.46	6.3648								196	T	2.8837	3.8625	3.4125
																														375	R	5.25	6.2985								197	N	3.5349	3.6668	3.2396
																														376	P		6.2101								198	V	2.1395	3.502	3.094
																														377	C	6.96	6.0775								199	E	2.186	3.3681	2.9757
																														378	Q	6.217	5.9228								200	V		3.2754	2.8938
																														379	L	5.14	5.7239								201	N	2.6047	3.1827	2.8119
																														380	P		5.4587								202	F	4.2791	3.1209	2.7573
																														381	F		5.1493								203	D	2.3721	3.0488	2.6936
																														382	P		4.8178								204	S	2.3721	2.987	2.639
																														383	S	3.77	4.4642								205	A	1.907	2.9252	2.5844
																														384	T	2.33	4.1548								206	A	1.3953	2.8531	2.5207
																																									207	G	0.9767	2.781	2.457
																																									208	H	7.1628	2.6986	2.3842
																																									209	T	1.4884	2.6162	2.3114
																																									210	V	1.907	2.5338	2.2386
																																									211	S	3.2558	2.4617	2.1749
																																									212	G	1.1163	2.4205	2.1385
																																									213	G	0.7907	2.4102	2.1294
																																									214	T	1.6279	2.4205	2.1385
																																									215	T	1.7209	2.472	2.184
																																									216	V	2.1395	2.5441	2.2477
																																									217	S	2.1395	2.6471	2.3387
																																									218	T	1.4884	2.7707	2.4479
																																									219	S	2.0465	2.9252	2.5844
																																									220	D	1.2558	3.1106	2.7482
																																									221	K	1.7674	3.3063	2.9211
																																									222	M	3.3953	3.4814	3.0758
																																									223	E	2.2791	3.6256	3.2032
																																									224	I	2	3.708	3.276
																																									225	K	2.0465	3.7183	3.2851
																																									226	R	2.4186	3.6668	3.2396
																																									227	N	1.3953	3.5638	3.1486
																																									228	E	2.1395	3.4505	3.0485
																																									229	N	2.5581	3.3063	2.9211
																																									230	L	2.1395	3.1518	2.7846
																																									231	Y	1.5814	2.9664	2.6208
																																									232	F	1.907	2.7501	2.4297
																																									233	Q	0.3721	2.5132	2.2204
