# Supplementary material for: Predicting the sequence-dependent backbone dynamics of intrinsically disordered proteins
Source: eLife. 2024 Oct 30;12:RP88958. doi: 10.7554/eLife.88958 (PMC11524581; doi:10.7554/eLife.88958)
Supplement: Figure 7—source data 1. [file elife-88958-fig7-data1.xlsx]

## Sheet: Fig. 7
A		R2 (s-1)			B		R2 (s-1)			C		R2 (s-1)			D		R2 (s-1)			R2
Res #	Seq	Expt	Pred		Res #	Seq	Expt	Pred		Res #	Seq	Expt	Pred		Res #	Seq	Expt	Pred			0.85
1	K		2.46246		1	K		2.0539		1	M	1.64405	1.715		1	M		2.057
2	V	2.0077	2.68632		2	V	1.7872	2.24143		2	V	1.80488	1.89		2	Q	1.74617	2.244
3	F		2.92084		3	F	1.993	2.43789		3	L		2.079		3	I	2.98687	2.4225
4	G	2.1132	3.1447		4	G	1.6347	2.62542		4	S	2.56876	2.282		4	F	2.97155	2.5585
5	R	2.8461	3.37922		5	R	2.2636	2.82188		5	E		2.499		5	V		2.6605
6	A	2.9939	3.59242		6	A		3.00048		6	G	3.1365	2.73		6	K	2.89497	2.7285
7	E	3.2899	3.80562		7	E	2.6575	3.17015		7	E		2.961		7	T		2.7795
8	L	3.8184	3.98684		8	L	2.8574	3.32196		8	W	3.99168	3.192		8	L	3.39278	2.8135
9	A	3.2261	4.14674		9	A	2.8517	3.45591		9	Q	4.71466	3.388		9	T	6.37199	2.8475
10	A		4.28532		10	A		3.572		10	L	4.71466	3.549		10	G	2.86433	2.8985
11	A	3.395	4.40258		11	A	2.9342	3.6613		11	V	4.49955	3.675		11	K	3.1477	2.9495
12	M	3.6627	4.48786		12	M	2.9697	3.74167		12	L		3.773		12	T	3.80635	3.009
13	K	3.9234	4.54116		13	K		3.77739		13	H	4.46558	3.836		13	I	3.38512	3.06
14	R		4.55182		14	R		3.78632		14	V		3.857		14	T	4.12035	3.094
15	H	4.2332	4.51984		15	H	3.2168	3.76846		15	W	4.34676	3.829		15	L	3.22429	3.1025
16	G	3.1828	4.4772		16	G	3.0348	3.72381		16	A	3.90392	3.745		16	E	3.50766	3.0855
17	L	3.9087	4.43456		17	L	3.0996	3.68809		17	K	3.50394	3.626		17	V	3.56893	3.06
18	D	3.9508	4.40258		18	D	3.0939	3.6613		18	V		3.486		18	E	3.55361	3.0345
19	N	4.1058	4.39192		19	N	3.2585	3.65237		19	E	4.06219	3.353		19	P		3.026
20	Y	4.3876	4.38126		20	Y	3.3586	3.64344		20	A	3.34277	3.234		20	S	3.71444	3.0345
21	R	4.7117	4.38126		21	R	3.3411	3.64344		21	D	3.05051	3.15		21	D	3.53829	3.0685
22	G	4.0912	4.3706		22	G	3.3412	3.63451		22	V	2.8514	3.101		22	T	3.41575	3.1195
23	Y	4.6127	4.35994		23	Y	3.7174	3.62558		23	A	2.60996	3.087		23	I	3.46937	3.1875
24	S	4.2601	4.34928		24	S	3.4179	3.61665		24	G	2.78771	3.129		24	E	3.47702	3.2555
25	L	4.1895	4.34928		25	L	3.3417	3.61665		25	H	2.65212	3.213		25	N	3.54595	3.332
26	G	3.7312	4.3706		26	G	3.4124	3.62558		26	G	3.27873	3.353		26	V	3.47702	3.4085
27	N	4.2949	4.39192		27	N	3.7591	3.64344		27	Q	3.32945	3.542		27	K	3.33917	3.4935
28	W	4.3864	4.41324		28	W	3.724	3.6613		28	D		3.766		28	A	3.53063	3.5785
29	V	4.9502	4.4239		29	V	3.6478	3.67023		29	I	4.25374	4.004		29	K	3.53063	3.638
30	A		4.41324		30	A	3.8242	3.65237		30	L	4.10833	4.214		30	I	3.46937	3.672
31	A	4.7102	4.38126		31	A	3.6598	3.61665		31	I	4.63093	4.375		31	Q	3.60722	3.672
32	A	4.4422	4.3173		32	A	3.284	3.56307		32	R	4.45961	4.459		32	D	3.34683	3.655
33	K	4.146	4.22136		33	K		3.4827		33	L	4.125	4.466		33	K	3.39278	3.6295
34	F	4.1247	4.09344		34	F		3.37554		34	F	4.125	4.41		34	E	3.5	3.604
35	E	4.5193	3.95486		35	E	3.9483	3.25052		35	K	4.27727	4.326		35	G	2.94858	3.5785
36	S	4.2231	3.79496		36	S	3.308	3.1255		36	S	5.21299	4.228		36	I	3.95186	3.57
37	N		3.65638		37	N		3.00941		37	H		4.158		37	P		3.587
38	F	4.244	3.53912		38	F	3.5551	2.91118		38	P	4.2516	4.109		38	P		3.621
39	N	4.2791	3.45384		39	N		2.82188		39	E	4.38701	4.102		39	D	4.39606	3.689
40	T	3.9195	3.37922		40	T	3.291	2.75937		40	T		4.123		40	Q	3.87527	3.7825
41	Q	4.1519	3.32592		41	Q	3.2735	2.71472		41	L	4.25557	4.165		41	Q	3.54595	3.893
42	A	3.7218	3.28328		42	A	3.1033	2.67007		42	E	3.99719	4.228		42	R	3.84464	3.995
43	T	3.6582	3.24064		43	T	3.1504	2.63435		43	K		4.298		43	L	3.69147	4.063
44	N	4.0387	3.20866		44	N	3.18	2.59863		44	F	4.69992	4.361		44	I	3.60722	4.0715
45	R		3.18734		45	R	3.092	2.57184		45	D	4.25946	4.417		45	F	3.56127	4.0205
46	N	3.8833	3.17668		46	N	2.9511	2.54505		46	R	5.08932	4.452		46	A	3.87527	3.9355
47	T		3.18734		47	T	3.2979	2.53612		47	F	4.43289	4.466		47	G	3.93654	3.8335
48	D	4.1227	3.21932		48	D	3.3333	2.55398		48	K		4.438		48	K	3.16302	3.7315
49	G	3.4247	3.3046		49	G	2.881	2.60756		49	H		4.375		49	Q	3.17068	3.6465
50	S	3.8052	3.44318		50	S	3.2102	2.68793		50	L	4.50647	4.284		50	L	3.43873	3.57
51	T	4.0659	3.63506		51	T	3.51	2.81295		51	K		4.172		51	E	3.37746	3.4935
52	D		3.88024		52	D	3.1988	2.96476		52	T	4.27578	4.053		52	D	3.33151	3.4425
53	Y	3.8259	4.1574		53	Y	4.0626	3.1255		53	E	5.17017	3.941		53	G	2.74179	3.4
54	G	4.3615	4.46654		54	G	3.816	3.29517		54	A	4.78797	3.843		54	R	3.32385	3.383
55	I	5.2142	4.76502		55	I	4.0453	3.43805		55	E	4.20354	3.752		55	T	3.38512	3.383
56	L	5.1859	5.04218		56	L	4.2275	3.54521		56	M		3.668		56	L	3.35449	3.3915
57	Q	4.4668	5.28736		57	Q		3.59879		57	K	4.03822	3.584		57	S	3.31619	3.417
58	I	5.3125	5.50056		58	I		3.61665		58	A	3.8984	3.514		58	D	3.38512	3.4595
59	N	5.8974	5.69244		59	N		3.60772		59	S		3.458		59	Y	3.47702	3.5105
60	S	5.4038	5.84168		60	S	3.7698	3.58093		60	E	4.24969	3.423		60	N	3.77571	3.5615
61	R	6.0451	5.9163		61	R		3.53628		61	D	3.47046	3.395		61	I	3.5	3.604
62	W	6.8133	5.863		62	G	2.9241	3.47377		62	L	3.75832	3.367		62	Q	3.54595	3.621
63	W	6.9329	5.67112		63	W		3.38447		63	K		3.325		63	R		3.6125
64	A	6.3407	5.35132		64	A		3.27731		64	K	3.69886	3.269		64	E	3.44639	3.5955
65	N	4.952	4.99954		65	N		3.17015		65	H	3.01703	3.206		65	S	3.4081	3.5615
66	D	5.121	4.64776		66	D	3.7472	3.06299		66	G	3.85959	3.143		66	T	3.37746	3.536
67	G	4.6274	4.35994		67	G	3.5065	2.97369		67	V	3.74517	3.101		67	L	3.28556	3.502
68	R	4.8881	4.13608		68	R	3.3245	2.91118		68	T	3.55031	3.094		68	H	3.30088	3.451
69	T	4.2535	3.96552		69	T	3.2541	2.8576		69	V	3.28345	3.122		69	L	2.84902	3.366
70	P		3.8376		70	P		2.83081		70	L		3.178		70	V	2.84136	3.2555
71	G	4.3378	3.76298		71	G	2.9489	2.83081		71	T	3.24093	3.255		71	L		3.0855
72	S		3.731		72	S	3.3838	2.84867		72	A	2.74118	3.353		72	R	2.56565	2.8815
73	R	4.0274	3.731		73	R	2.9786	2.88439		73	L		3.465		73	L		2.6435
74	N		3.75232		74	N	3.0434	2.92904		74	G	3.28725	3.591		74	R	2.05252	2.38
75	L	4.2105	3.77364		75	L		2.97369		75	A	2.48686	3.724		75	G	1.38621	2.125
76	A	4.3442	3.79496		76	A	3.214	3.00941		76	I	3.42258	3.85		76	G	0.934354	1.904
77	N	4.1749	3.80562		77	N	2.75	3.0362		77	L		3.955
78	I	4.3157	3.82694		78	I	3.5139	3.06299		78	K		4.025
79	P		3.82694		79	P		3.08085		79	K	3.43502	4.06
80	A	4.1392	3.82694		80	A	3.5436	3.09871		80	K	3.3079	4.081
81	S	4.6748	3.8376		81	S	3.2441	3.10764		81	G	4.15893	4.095
82	A	4.449	3.8376		82	A	3.6379	3.11657		82	H	3.29926	4.116
83	L	4.3925	3.82694		83	L	3.1739	3.11657		83	H	3.62099	4.13
84	L	3.6875	3.80562		84	L		3.10764		84	E	4.37463	4.137
85	S	4.1102	3.77364		85	S	3.1507	3.08978		85	A	4.2221	4.137
86	S		3.74166		86	S		3.06299		86	E	4.09921	4.123
87	D	3.7645	3.69902		87	D	3.5505	3.04513		87	L	4.57338	4.095
88	I	3.8419	3.66704		88	I		3.01834		88	K		4.06
89	T	3.5458	3.6244		89	T	2.8222	2.99155		89	P		4.025
90	A	3.4681	3.59242		90	A	3.0574	2.95583		90	L	3.90832	3.997
91	S	4.2433	3.56044		91	S	3.2984	2.93797		91	A	4.67466	3.99
92	V		3.56044		92	V	3.2222	2.93797		92	Q		4.004
93	N	4.0527	3.58176		93	N		2.96476		93	S		4.06
94	A	3.5662	3.64572		94	A	2.5116	3.00941		94	H		4.151
95	A	3.4744	3.70968		95	A		3.07192		95	A	3.80998	4.277
96	K		3.75232		96	K		3.10764		96	T		4.445
97	K		3.76298		97	K		3.11657		97	K	4.34808	4.627
98	I	4.2	3.72034		98	I		3.08978		98	H	4.86036	4.83
99	V	4.0166	3.64572		99	V	3.2115	3.02727		99	K		5.019
100	S	4.0657	3.5711		100	S	2.3773	2.96476		100	I		5.187
101	D	3.0153	3.52846		101	D	3.0297	2.92904		101	P		5.327
102	G	3.3254	3.52846		102	G	3.0122	2.93797		102	I		5.432
103	N	3.5719	3.61374		103	N	2.9888	3.00941		103	K		5.495
104	G		3.7843		104	G	2.9537	3.14336		104	Y	5.84223	5.523
105	M	3.3249	4.02948		105	M	3.5296	3.34875		105	L		5.502
106	N	4.0931	4.33862		106	N	3.5357	3.60772		106	E		5.46
107	A	4.5088	4.67974		107	A	4.0528	3.89348		107	F		5.39
108	W	5.2558	5.0102		108	W	4.3879	4.17031		108	I	5.25515	5.313
109	V	5.7632	5.2767		109	V	4.6231	4.39356		109	S	4.50372	5.236
110	A	5.7348	5.44726		110	A	4.9346	4.53644		110	E	4.49939	5.166
111	W		5.4899		111	W	4.7409	4.57216		111	A	4.28758	5.096
112	R	5.7205	5.41528		112	R	3.8538	4.50965		112	I	4.70671	5.012
113	N	3.4506	5.24472		113	N	4.794	4.3757		113	I	4.80401	4.893
114	R	4.8038	5.03152		114	R	4.3124	4.1971		114	H	4.05443	4.725
115	A	4.5781	4.80766		115	A	3.9659	4.00957		115	V	4.10093	4.522
116	K	4.2467	4.61578		116	K	3.4549	3.84883		116	L	4.12624	4.298
117	G	3.5064	4.4772		117	G	3.0496	3.73274		117	H	4.02876	4.067
118	T	3.6825	4.40258		118	T	3.2848	3.67023		118	S	3.59253	3.836
119	D		4.40258		119	D	3.2556	3.67916		119	R		3.612
120	V	4.1545	4.46654		120	V	3.3027	3.73274		120	H		3.388
121	Q	4.0204	4.56248		121	Q		3.80418		121	P	2.97406	3.185
122	A	4.1119	4.62644		122	A	3.2266	3.85776		122	G	3.05441	3.017
123	W	4.9858	4.61578		123	W	3.5382	3.85776		123	D	2.44457	2.877
124	I	4.3301	4.50918		124	I		3.75953		124	F	2.5207	2.779
125	R	3.759	4.28532		125	R	3.4856	3.572		125	G		2.709
126	G	3.2584	3.98684		126	G	3.0333	3.33089		126	A	2.67483	2.66
127	A	3.0468	3.65638		127	A	2.8278	3.05406		127	D	2.43575	2.639
128	R	2.7083	3.3046		128	R	2.2992	2.7683		128	A	2.68973	2.639
129	L	2.2429	2.97414		129	L	1.9057	2.48254		129	Q	2.23656	2.66
										130	G		2.702
										131	A	2.78025	2.772
										132	M	3.05778	2.87
										133	N	3.21436	2.989
										134	K	4.00611	3.129
										135	A	3.93404	3.276
										136	L	3.99324	3.43
										137	E	3.81106	3.556
										138	L		3.661
										139	F	3.90828	3.724
										140	R		3.745
										141	K	3.74906	3.731
										142	D	3.438	3.682
										143	I	3.43792	3.612
										144	A		3.514
										145	A	3.35305	3.402
										146	K		3.262
										147	Y	3.3317	3.094
										148	K	2.8743	2.905
										149	E		2.688
										150	L	2.31095	2.457
										151	G	2.13301	2.226
										152	Y	1.62903	2.002
										153	Q	1.14623	1.799
										154	G		1.617
