# Supplementary material for: Predicting the sequence-dependent backbone dynamics of intrinsically disordered proteins
Source: eLife. 2024 Oct 30;12:RP88958. doi: 10.7554/eLife.88958 (PMC11524581; doi:10.7554/eLife.88958)
Supplement: Figure 8—source data 1. [file elife-88958-fig8-data1.xlsx]

## Sheet: Fig. 8
A		R2 (s-1)			B		R2 (s-1)
Res #	Seq	Expt	Pred		Res #	Seq	Expt	Pred
58	R	9.11731	7.788		58	R	9.11731	7.788
59	K	10.453	8.5536		59	K	10.3949	8.5536
60	W	10.2787	9.24		60	W	14.8084	9.24
61	N	14.6341	9.7416		61	N	19.4541	9.7416
62	F	12.4274	10.0848		62	F	18.1185	10.0848
63	D	12.3113	10.3224		63	D	12.2532	10.3224
64	F	10.9756	10.5072		64	F	14.9245	10.5072
65	Q	12.3113	10.692		65	Q	13.4727	10.692
66	N	12.8339	10.8768		66	N	14.6922	10.8768
67	H	12.9501	11.088		67	H	14.0534	11.088
68	K		11.3256		68	K		11.3256
69	P		11.5896		69	P		11.5896
70	L	10.7433	11.88		70	L	13.0081	11.88
71	E	10.5691	12.1968		71	E	12.137	12.1968
72	G	9.81417	12.5664		72	G	9.63995	12.5664
73	K		12.9624		73	K		12.9624
74	Y	11.6725	13.2792		74	Y	13.4727	13.2792
75	E	13.3566	13.464		75	E	18.1185	13.464
76	W	14.8664	13.4112		76	W	27.5261	13.4112
77	Q	14.5761	13.1736		77	Q	41.4634	13.1736
78	E	10.7433	12.7776		78	E	19.5122	12.7776
79	V	10.9175	12.3288		79	V	14.9245	12.3288
80	E		11.9064		80	E		11.9064
81	K	19.5122	11.5896		81	K	21.6609	11.5896
82	G	11.2079	11.4048		82	G	12.8339	11.4048
83	S	10.3949	11.352		83	S	10.3949	11.352
84	L	10.3949	11.4312		84	L	12.0209	11.4312
85	P		11.616		85	P		11.616
86	E	11.7305	11.8272		86	E	13.1243	11.8272
87	F	11.9628	11.9592		87	F	16.957	11.9592
88	Y	13.3566	11.9592		88	Y	23.9257	11.9592
89	Y	12.6597	11.7744		89	Y	22.1835	11.7744
90	R	11.3821	11.4048		90	R	16.3763	11.4048
91	P		10.9032		91	P		10.9032
92	P		10.3752		92	P		10.3752
93	R	8.65273	9.8208		93	R	8.65273	9.8208
94	P		9.2928		94	P		9.2928
95	P		8.7912		95	P		8.7912
96	K	6.03949	8.3688		96	K	6.09756	8.3688
97	G	5.11034	7.9728		97	G	5.16841	7.9728
98	A	3.83275	7.656		98	A	3.89082	7.656
99	C	3.3101	7.3392		99	C	3.19396	7.3392
100	K	3.07782	7.0488		100	K	3.01974	7.0488
101	V		6.732		101	V		6.732
102	P		6.3888		102	P		6.3888
103	A		6.0456		103	A		6.0456
104	Q	1.4518	5.676		104	Q	1.39373	5.676
105	E	0.813008	5.3064		105	E	0.87108	5.3064
