# Supplementary material for: Predicting the sequence-dependent backbone dynamics of intrinsically disordered proteins
Source: eLife. 2024 Oct 30;12:RP88958. doi: 10.7554/eLife.88958 (PMC11524581; doi:10.7554/eLife.88958)
Supplement: Figure 9—source data 1. [file elife-88958-fig9-data1.xlsx]

## Sheet: Fig. 9
	s3l	q
R	206.295	1.1727
D	7.22833	1.0338
N	77.9888	0.9929
E	0.143893	1.1016
K	46.0549	1.1187
H	104.819	1.1554
Q	85.8339	1.0688
S	64.2895	1.0125
C	92.4113	1.0515
G	64.3237	0.9762
T	65.9102	1.0387
A	35.1208	1.0823
M	125.296	1.1014
Y	263.51	1.1788
V	41.9317	1.0357
W	308.355	1.3813
L	152.003	1.1415
I	128.013	1.22
P	61.7585	1.0404
F	223.105	1.1414
